# Supplementary material for: The FOXO1 inhibitor AS1842856 triggers apoptosis in glioblastoma multiforme and basal‐like breast cancer cells
Source: PubMed Central journal article supplement (PMC9900086; doi:10.1002/2211-5463.13547), 2023-01-16
Supplement: FEB4-13-352-s002.pdf [file FEB4-13-352-s002.pdf]

Fig. S2

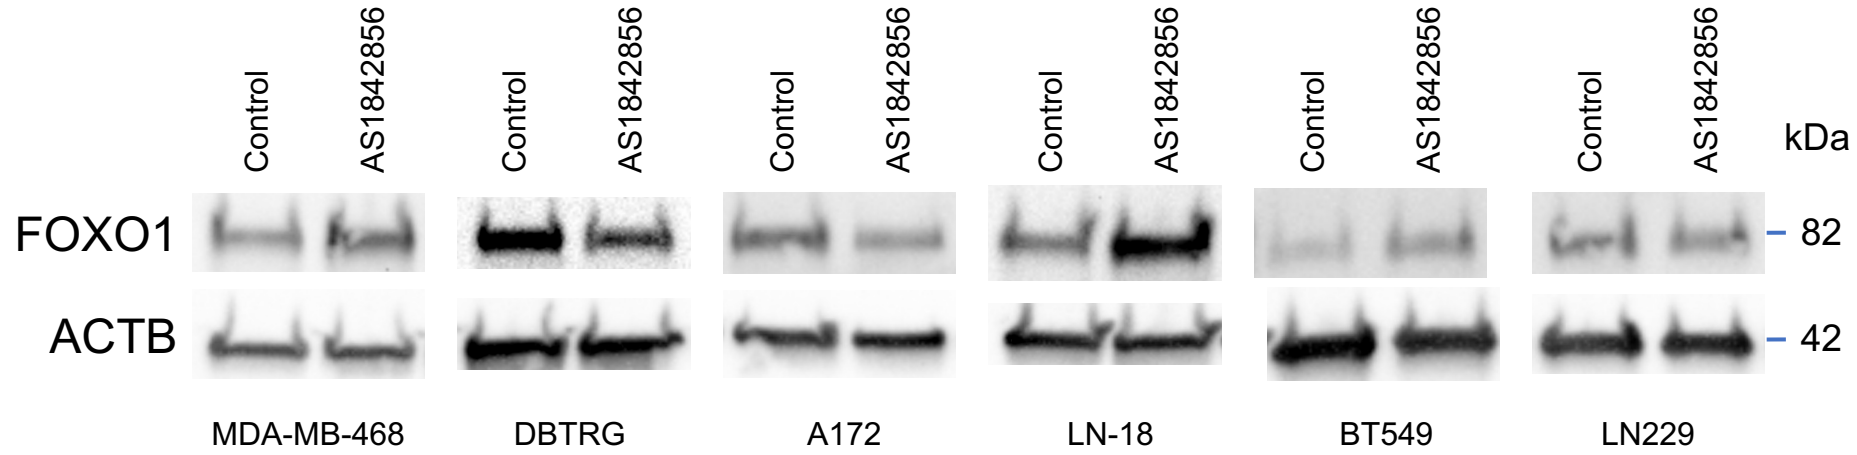

Fig. S2 AS1842856 treatment had varied impacts on FOXO1 protein expression in BBC and GBM cell lines. Indicated cell lines were treated with 1 micromolar AS1842856 for 48 hours and analyzed by western blot analysis. The actin control for MDA-MB-469 is the same as in Figure 5A.
