# Supplementary material for: The FOXO1 inhibitor AS1842856 triggers apoptosis in glioblastoma multiforme and basal‐like breast cancer cells
Source: PubMed Central journal article supplement (PMC9900086; doi:10.1002/2211-5463.13547), 2023-01-16
Supplement: FEB4-13-352-s003.pdf [file FEB4-13-352-s003.pdf]

Fig. S3

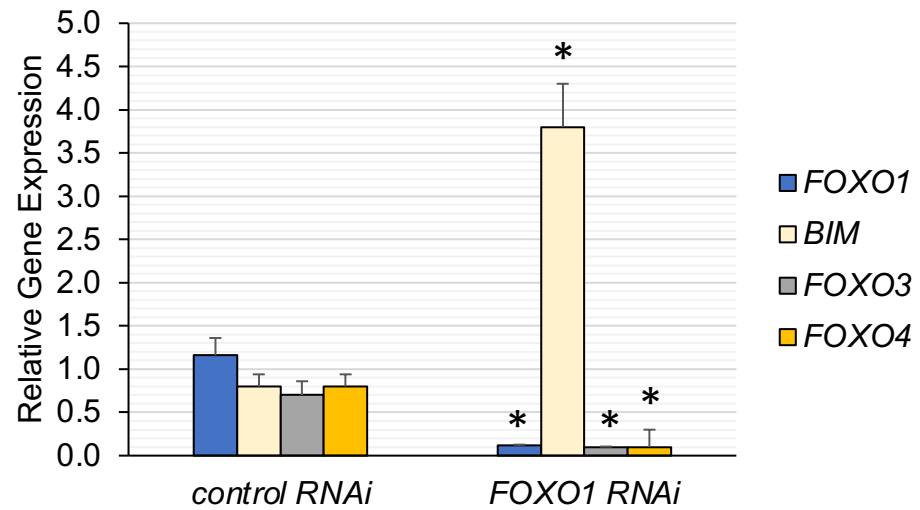

Fig. S3 *FOXO1* RNAi Treatment led to the induction of *BIM*. *FOXO1* RNAi samples had increased *BIM* and decreased *FOXO3* and *FOXO4* in BT549 cells. These samples were treated with *FOXO1* esiRNA and samples collected 18-hours post-transfection. \* denotes significantly different by Tukey Test compared to control ( $P < 0.05$ ).
