# Supplementary material for: The FOXO1 inhibitor AS1842856 triggers apoptosis in glioblastoma multiforme and basal‐like breast cancer cells
Source: PubMed Central journal article supplement (PMC9900086; doi:10.1002/2211-5463.13547), 2023-01-16
Supplement: FEB4-13-352-s004.pdf [file FEB4-13-352-s004.pdf]

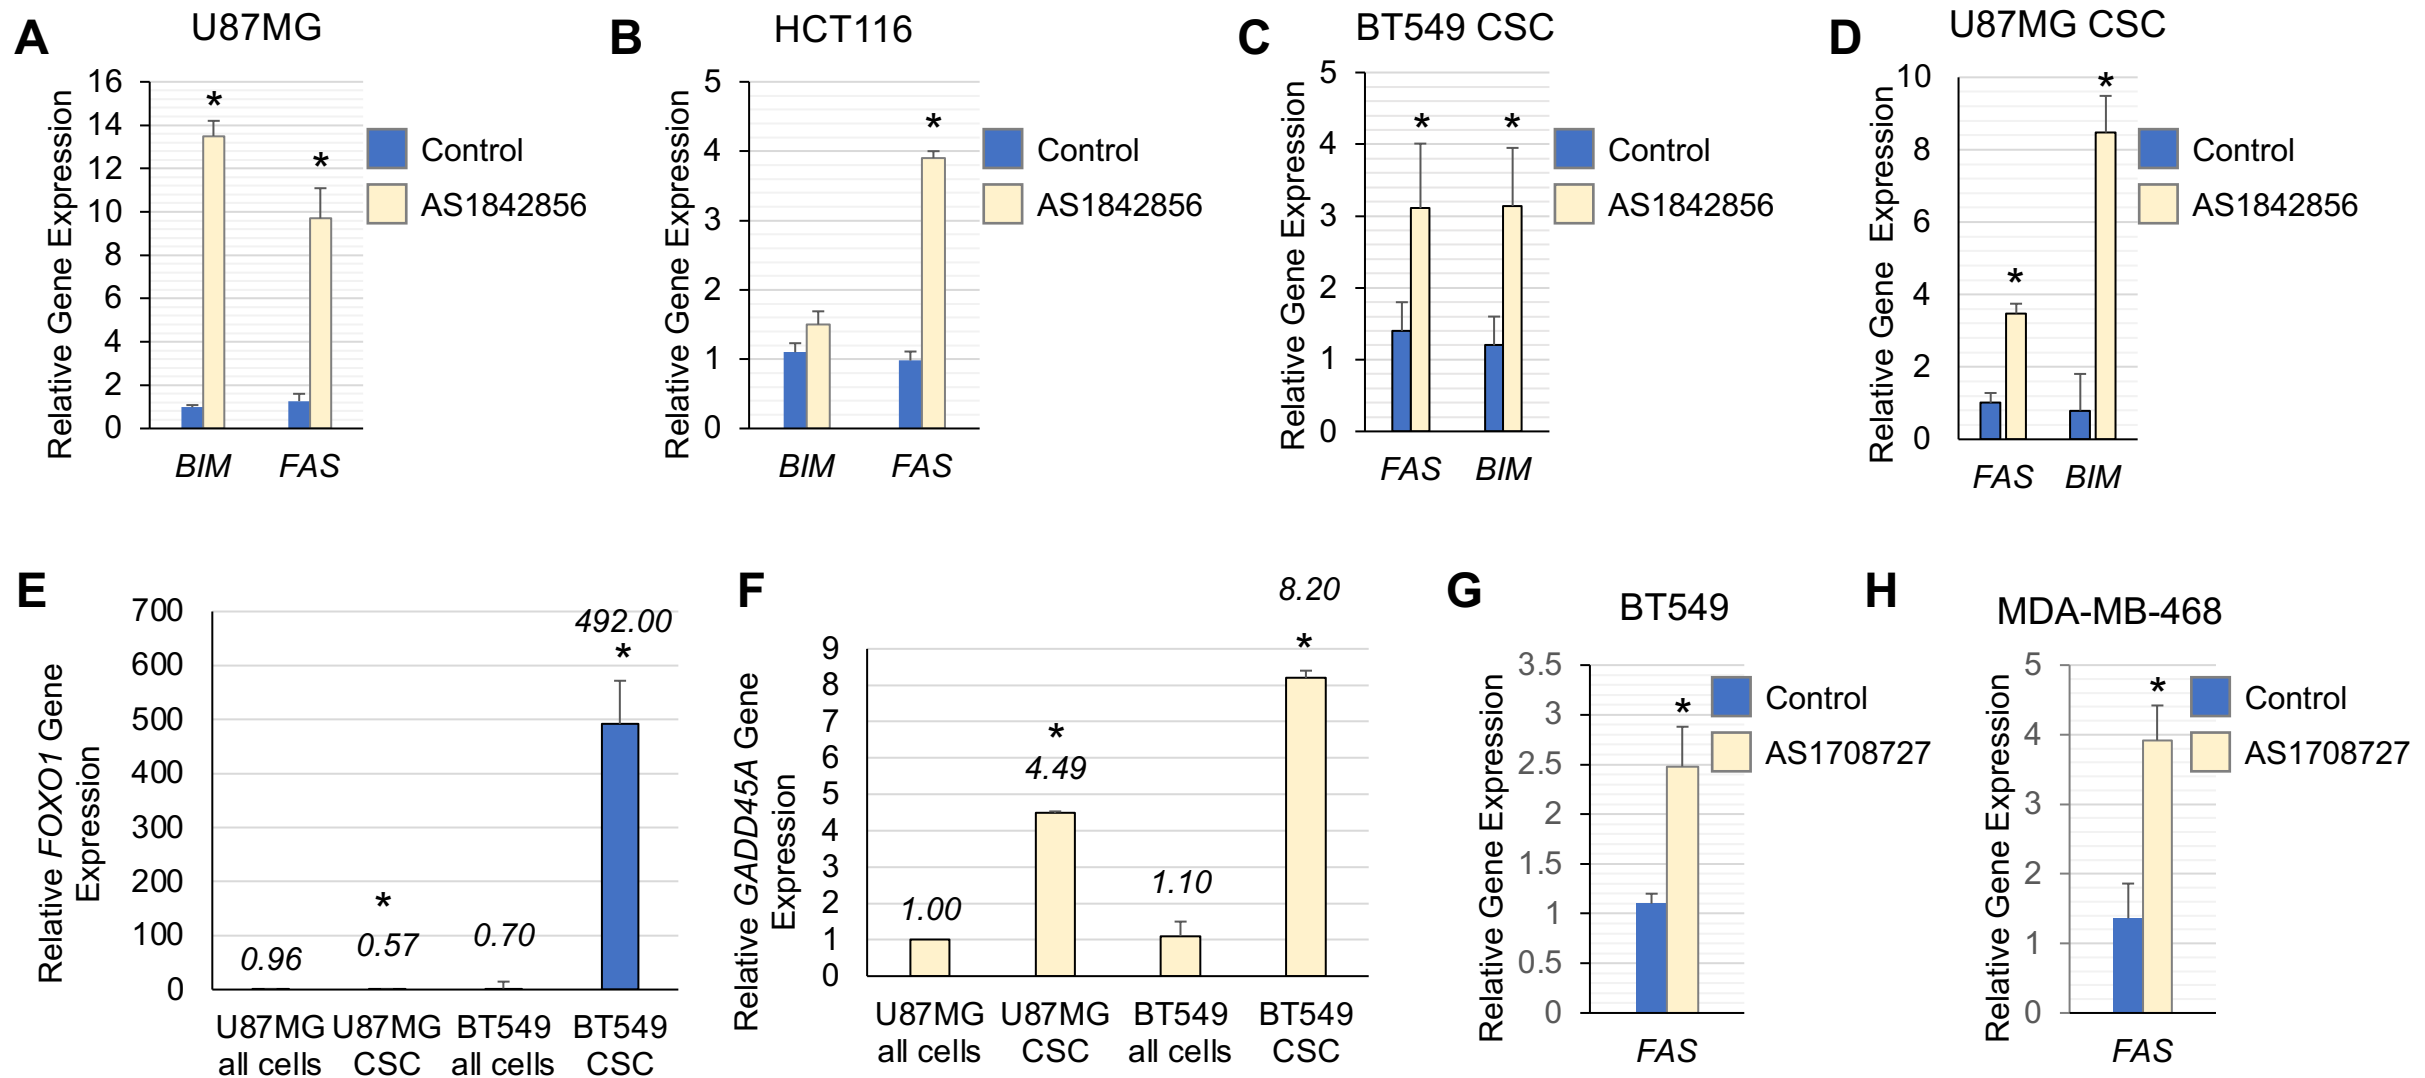

Fig. S1. AS1842856 Treatment led to the induction of pro-apoptotic genes. (A-D) Indicated cell lines were treated with 1 $\mu$ M AS1842856 for 48 hours and examined for changes in gene expression by qRT-PCR using *TUBB* as the reference gene. We found that AS1842856 treatment induced apoptotic genes *FAS* and/or *BIM* in U87MG and HCT116 cell lines as well as in BT549 cancer stem cells (CSCs) and U87MG CSCs. (E) *FOXO1* gene expression was assessed by qRT-PCR. (F) *GADD45A* gene expression was assessed by qRT-PCR. (G-H) Treatment with AS1708727 led to *FAS* induction in BT549 (1 $\mu$ M treatment for 4 days) and MDA-MB-468 cells (1 $\mu$ M treatment for two days). \* denotes significantly different by Tukey Test compared to control ( $P < 0.05$ ).
